# Supplementary material for: Akt isoform-specific effects on thyroid cancer development and progression in a murine thyroid cancer model
Source: Sci Rep. 2020 Oct 27;10:18316. doi: 10.1038/s41598-020-75529-0 (PMC7591514; doi:10.1038/s41598-020-75529-0)
Supplement: Supplementary file 2 — Supplementary Information. [file 41598_2020_75529_MOESM2_ESM.pdf]

Supplementary data for:

Akt isoform- specific effects on Thyroid Cancer Development and Progression in a Murine Thyroid Cancer Model

Motoyasu Saji<sup>1</sup>, Caroline S. Kim<sup>2</sup>, Chaojie Wang<sup>1</sup>, Xiaoli Zhang<sup>3</sup>, Tilak Khanal<sup>1</sup>, Kevin Coombes<sup>3,4</sup>, Krista La Perle<sup>5</sup>, Sheue-Yann Cheng<sup>6</sup>, Philip N. Tschlis<sup>7</sup>, Matthew D. Ringel<sup>1,7</sup>

<sup>1</sup>Division of Endocrinology, Diabetes, and Metabolism, <sup>3</sup>Center for Biostatistics, <sup>4</sup>Department of Biostatistics and Bioinformatics, and <sup>7</sup>Department of Cancer Biology and Genetics, The Ohio State University College of Medicine and Arthur G. James Comprehensive Cancer Center, Columbus OH;

<sup>2</sup>Division of Endocrinology, University of Pennsylvania, Philadelphia, PA; <sup>5</sup>College of Veterinary Medicine, The Ohio State University, <sup>6</sup>National Cancer Institute, National Institutes of Health, Bethesda, MD,

**Table of contents:**

**SUPPLEMENTAL INFORMATION**

Detailed Materials and Methods

Supplemental Figure 1: Adjusted thyroid volumes over time

Supplemental Figure 2: IHC of cleaved caspase 3 in mouse thyroid

Supplemental Figure 3: IHC of adrenomedullin 2 in mouse and human thyroid tissues

Supplemental Figure 4: IF controls for CD209a and CD205

Supplemental Figure 5: Full Length WB for Figure 1

Supplemental Table 1: PCR primers

Supplemental Table 2: Antibodies

Supplemental Table 3: TSH levels

Supplemental Tables 4: Microarray data from mouse thyroids

Sheet 1: All genes examined by microarray analysis

Sheet 2: Up- and Down-regulated genes in PVPV-Akt1KO compared to PVPV-AktWT

Sheet 3: Up- and Down-regulated genes in PVPV-Akt2KO compared to PVPV-AktWT

Sheet 4: Up- and Down-regulated genes in PVPV-Akt3 KO compared to PVPV-AktWT

Sheet 5: Up- and Down-regulated unique genes in PVPV-Akt1KO

Sheet 6: Up- and Down-regulated unique genes in PVPV-Akt2 KO

Sheet 7: Up- and Down-regulated unique genes in PVPV-Akt3KO

Sheet 8: Up-and Down-regulated genes jointly in PVPV-Akt1KO and Akt3KO

## **Detailed Materials and Methods**

### **Mouse Breeding**

Original TR $\beta$ PV was a mixed strain of C57BL/6J x 129SV. Akt1KO was C57BL/6J. Both Akt2KO and Akt3KO mice were C57BL/6J x CD-1. Current studies have been approved by Institutional Animal Care and Use Committee. All mouse strains were maintained concomitantly in an Association for Assessment and Accreditation of Laboratory Animal (AAALAC)-approved facility and normal rodent chow was used.

### **Primary Cell Culture:**

After isolating the thyroid glands, one lobe of each thyroid was further isolated by eliminating surrounding connective tissues and chopped to 3~5 mm pieces onto a 10 cm plate. Pieces were collected in PBS in 50 mL tubes that were centrifuged at 500 g for 3 min at 4 C. After washing with ice-cold PBS, the pieces were placed in a 10x volume of 0.05% Trypsin (Thermo Fisher Scientific Inc., Waltham, MA) overnight at 4 C. Trypsin was blocked by adding equal volume of 6H medium<sup>1</sup> in 10% FBS, 50  $\mu$ g/mL gentamycin, and 1  $\mu$ g/mL fungizone. After washing twice with 6H medium, the pieces were transferred onto a sterile cell strainer (100  $\mu$ m, Thermo Fisher Scientific, Inc.) and passed through the mesh using a 3 mL plastic syringe. The collected medium was centrifuged at 500 x g for 5 min, supernatant was aspirated and pellet was reconstituted with 6H medium and seeded onto a 6-well plate. After 2-4 days, the attached cells were used for experiments.

### **Cell Motility:**

For cell migration, the cell suspension (final concentration of  $3 \times 10^4$ /well) was placed on the top of transwell filter in a Boyden chamber (8  $\mu$ m pore size, Millipore Sigma, Burlington, MA) in 300  $\mu$ l 6H medium containing 0.2% FCS. The lower chamber was filled with 400  $\mu$ l of 6H medium containing 5% FCS. After 24 hours the cells were fixed with 3.7% formaldehyde containing 0.05% crystal violet for 15 min and counted as described<sup>2</sup>.

Cell invasion was examined as described<sup>6</sup>. Briefly, cells were seeded similar to cell migration assay, but using Corning BioCoat growth factor-free matrigel coated transwell filters (Thermo Fisher, Inc.). After staining with 0.05% crystal violet and washing chambers with distilled water, cells on the upper chamber were scraped by using a cotton swab. Five areas were randomly selected and images of invaded cells under membrane were taken using an Axiovert 40CFL microscope (Zeiss United States, Richmond, VA). Stained areas representing invasive cells were calculated by using ImageJ software (NIH, Bethesda, MD).

### **Immunohistochemistry:**

The tissue sections were dewaxed by soaking in Xylene twice for 15 min, and hydrated serially in different concentration of alcohol and dH<sub>2</sub>O. After microwave treatment in antigen unmasking solution (Vector Laboratory, Inc., Burlingame, CA) for 10 min, endogenous peroxidase activity was inactivated by incubating in 3% hydrogen peroxide for 15 min and washed with PBS 3 times for 5 min. The sections were incubated with 1<sup>st</sup> antibody in PBS at 4°C overnight (Supplemental Table 2). After washing with PBS, immunostaining was performed using the Vectastain Universal Quick kit and Peroxidase Staining Kit (DAB) according to the manufacturer's instructions (Vector Laboratories, Inc.), and counterstained with Hematoxylin. Antiserum was omitted in the negative control<sup>4, 6</sup>.

**Immunofluorescence:**

Sections were treated and incubated with 1<sup>st</sup> antibody in PBS at 4°C overnight (Supplemental Table 2). After washing with PBS, fluorescence-conjugated secondary antibodies (Supplemental Table 2) were incubated for 1 hour. After washing slides with PBS twice, they were mounted by using Vectashield containing DAPI (Thermo Fisher Scientific, Inc.). Immunofluorescence photos were taken at the Campus Microscope Imaging Facility using FV3000 confocal laser scanning microscope (Olympus America Co., Center alley, PA).

**RNA isolation and RT-PCR analysis:**

We isolated RNA and performed RT-PCR similar to previously described<sup>4, 6</sup>.

To isolate RNA, after addition of 200 µl of chloroform at room temperature, tubes were shaken, incubated for 2 min at room temperature and centrifuged at 16,000 g for 15 min at 4°C. The supernatant was transferred into a 1.5 ml tube, mixed with 500 µl of isopropanol and 20 µg glycogen, and centrifuged at 16,000 g for 15 min at 4°C. The supernatant was aspirated and the pellets containing RNA were washed using 70% ethanol and air-dried. The RNA was then reconstituted in DEPC-treated water and further purified by using RNA Clean-up and Concentration Micro-Elute Kit (Norgen BIOTEK Co., Thorold, ON, Canada). The concentration was measured by NanoDrop ND-1000 (NanoDrop Technologies, LLC, Wilmington, DE).

For RT-PCR, 400 - 800 ng of RNA were treated with DNase I (Thermo Fisher) for 15 min and 400 ng of DNase-treated RNA were reversed transcribed using the TaqMan® Reverse Transcription Reagents Kit (Thermo Fisher). Quantitative PCR was performed in 96 sample plates using cDNA equivalent to 24 ng of total RNA per 20 µl per well. As an internal control to

normalize gene expression, 18S ribosomal RNA was amplified using Taqman Ribosomal RNA control reagents kit as described<sup>3</sup>. Specific primers for various genes were listed in Supplemental Table 1, and PCR was performed with SYBR Green Mix (Thermo Fisher Scientific, Inc.) for AKT1 and TaqMan® Universal PCR Master Mix (Thermo Fisher Scientific, Inc.) for other genes using the following parameters: after an initial 2 min incubation at 50°C for inactivation of AmpEASE UNG activity, the cDNA was denatured at 94°C for 10 min and samples were subjected to 40 cycles of a two-step amplification protocol that included 15 seconds at 94°C and a one-minute annealing-elongation step at 60°C. Target gene and 18S were amplified in all samples in duplicate in two separate reactions. Negative controls were included for the RT (RT negative) and PCR (Non-Template Control) reactions. To compare expression levels, difference of threshold ( $\Delta Ct$ ) were calculated by subtracting threshold (Ct-18S) of 18S from threshold (Ct-gene) of the target gene, and expression levels were estimated by  $2^{(-\Delta Ct)}$ .

### **Protein Isolation and Immunoblotting:**

Cells were washed with ice-cold PBS twice, scraped, collected into microcentrifugation tubes, and centrifuged at 300 x g for 5 min at 4 °C. Cell pellets were washed again with ice-cold PBS and lysed with ice-cold M-PER buffer (Thermo Fisher Scientific, Inc.) containing 1 µg/ml leupeptin, 1 µg/ml pepstatin, 1µg/ml aprotinin, 20 µM 4-amidino-phenylmethane-sulfonyl fluoride (APMSF), and 0.3 µM okadaic acid for 10 min on ice. They were centrifuged at 12,000 x g for 10 minutes at 4°C. The supernatants were transferred into fresh tubes and stored at –80 °C. The protein concentration of cell lysates was determined using a micro BCA protein assay reagent kit (Thermo Fisher Scientific, Inc.) <sup>4,6</sup>.

When protein from tissues was isolated, tissue was placed in 5-10 volume of the same buffer as described above and homogenized by hand homogenizer (PowerGen 125, Thermo Fisher Scientific, Inc.).

Twenty µg of total protein lysate were suspended in reduced SDS sample buffer (Thermo Fisher Scientific, Inc.) and boiled for 5 minutes. Protein lysates were subjected to 8% or 4-10% SDS-PAGE, and the separated proteins were transferred to nitrocellulose membranes (0.45 µm pore size, Thermo Fisher Scientific, Inc.) by electrophoretic blotting (Thermo Fisher Scientific, Inc.). Nonspecific binding was prevented by blocking the membrane with TBS-T (0.1% Tween 20 in 20 mM Tris-HCl, pH 7.6 and 137 mM NaCl) containing 5% nonfat dry milk for 2 hr at RT. Immunoblotting was performed as previously described<sup>4-6</sup>. Background measures were obtained from each lane and subtracted from the measured band. Immunoblots of the same protein samples was performed for GAPDH to verify equal loading and for normalization for quantitation between lanes.

## References for Supplemental Materials and Methods

- 1 Ambesi-Impiombato, F.S., Parks, L.A. & Coon HG. Culture of hormone-dependent functional epithelial cells from rat thyroids. *Proc Natl Acad Sci U S A* **77**, 3455-3459 (1980).
- 2 McCarty, S.K., *et al.* Group I p21-activated kinases regulate thyroid cancer cell migration and are overexpressed and activated in thyroid cancer invasion. *Endocr Relat Cancer* **17**, 989-999 (2010).
- 3 Ringel, M.D., *et al.* Overexpression and Overactivation of Akt in Thyroid Carcinoma. *Cancer Res* **61**, 6105-6111 (2001).
- 4 Saji, M., *et al.* Akt1 deficiency delays tumor progression, vascular invasion, and distant metastasis in a murine model of thyroid cancer. *Oncogene* **30**, 4307-4315 (2011).
- 5 Vasko, V., *et al.* Akt activation and localization correlate with tumor invasion and oncogene expression in thyroid cancer. *J Mol Genet* **41**, 161-170 (2004).

- 6 Wang, C., *et al.* RCAN1-4 is a thyroid cancer growth and metastasis suppressor. *JCI Insight* **2**, e90651 (2017).

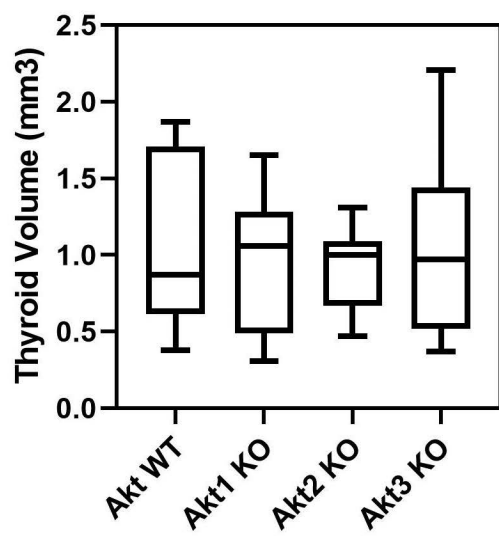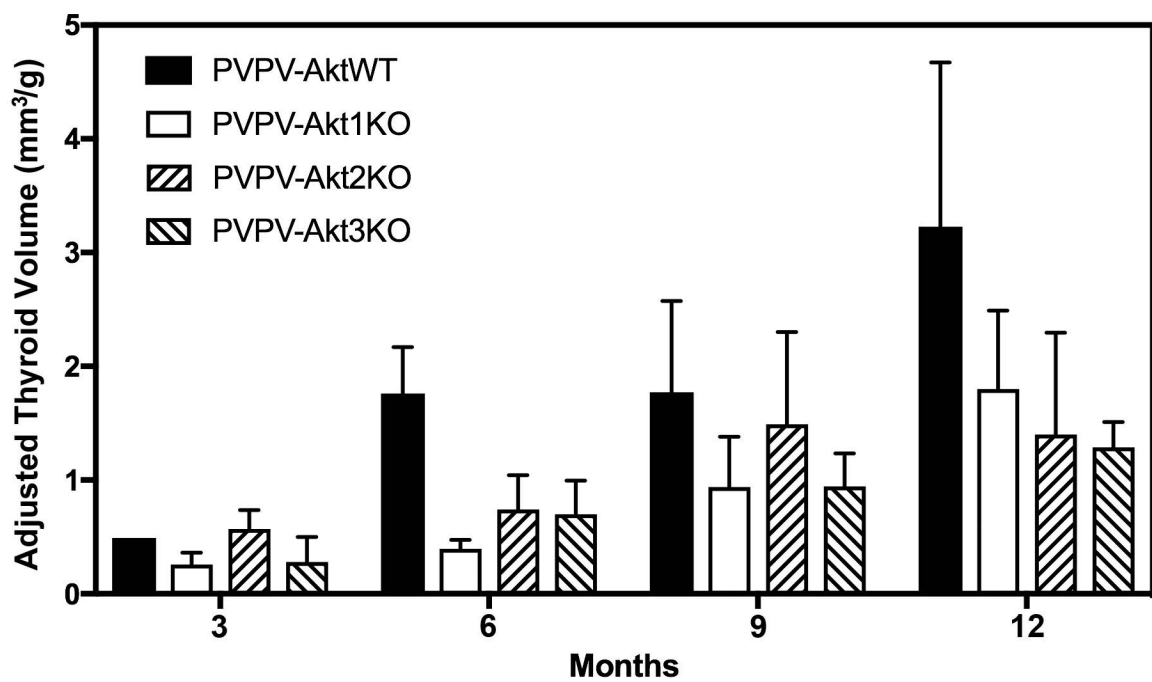





**A** Supplementary Fig 4

**Red**

**DAPI**

**Merged**

**Control  
Rabbit IgG**

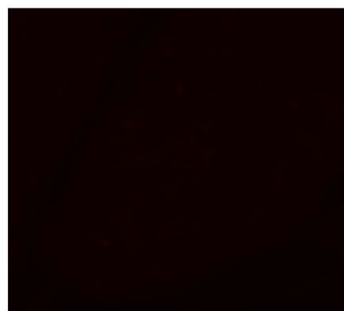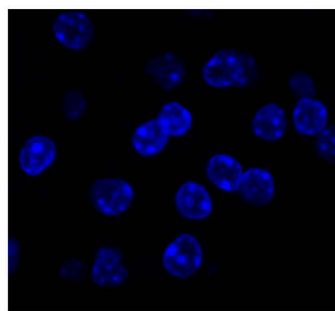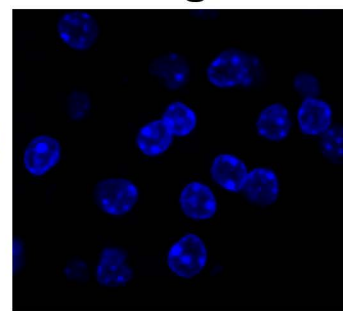

**B**

**Green**

**DAPI**

**Merged**

**Control  
Mouse IgG**

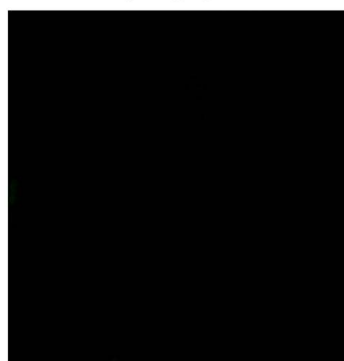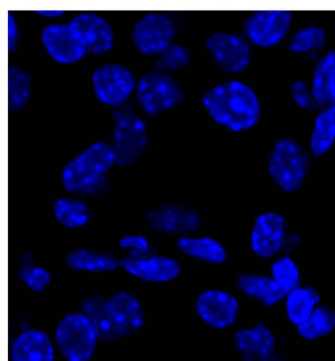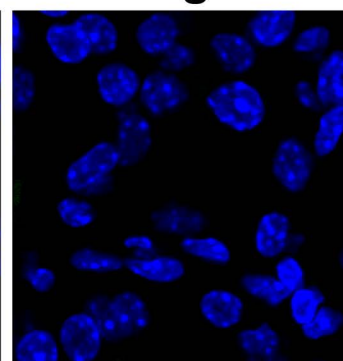

**C**

**Red**

**Green**

**1st Ab  
negative**

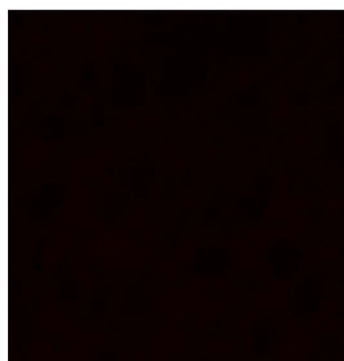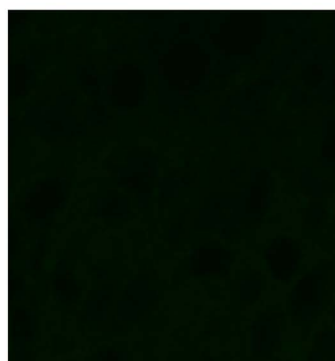

**DAPI**

**Merged**

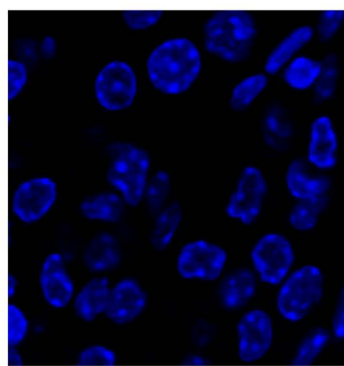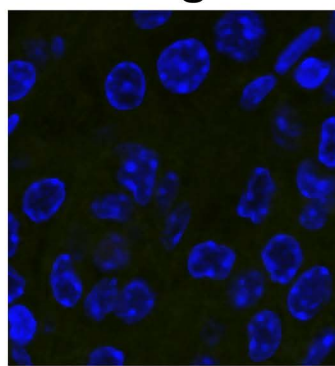

Supplementary Fig 5

**Akt1**

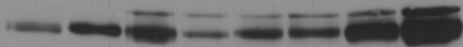

**Akt2**

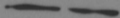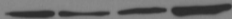

Akt3

3  
2

GAPDH Akt 1 and 2

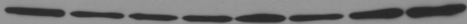

GAPDH Akt3

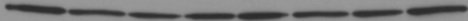

Supplementary Table 1

|                    |                 |                |                                     |                                 |        |
|--------------------|-----------------|----------------|-------------------------------------|---------------------------------|--------|
| Genotype Screening | target          | Forward primer |                                     | Reverse primer                  |        |
|                    | Akt1            | wild-type      | CAG CTC TTC TTC CAC CTG TCT C       | CAG ACT GTA TCT CAC CTG CGA AAG | 144 bp |
|                    |                 | KO             | GTG GAT GTG GAA TGT GTG CGA G       |                                 | 259 bp |
|                    | Akt2            | wild-type      | TAC ACT TCA TTC TCA GTA TTG TTT TGC | TGG ACA ATC TGT CTT CAT GCC AC  | 110 bp |
|                    |                 | KO             | ACC AAC CCC CTT TCA GCA CTT G       |                                 | 277 bp |
|                    | Akt3            | wild-type      | GGG AGA GAG AAG TGC CAT TGT ATT G   | GCA TCC ATC CTT GTT CAC GC      | 650 bp |
|                    |                 | KO             |                                     | GTG GGG TGG GAT TAG ATA AAT GC  | 700 bp |
|                    | TRβPV           | wild-type      | TCC CCA AGC CAG CAT CCC GAC C       | CGG GCA AAT CCT TAC CTG G       | 452 bp |
|                    |                 | KO             | TGC AGT GGC GAT GGC ATC             | TGC AGT GGC GAT GGC ATC         | 546 bp |
| Detection          | Akt1            | Forward        | AGC TCT TCT TCC ACC TGT CTC G       |                                 |        |
|                    |                 | Reverse        | CGG CGT TCC GCA GAA TGT             |                                 |        |
|                    | Akt2            | Taqman         | Mm00545827_m1                       |                                 |        |
|                    | Akt3            | Taqman         | Mm00442194_m1                       |                                 |        |
|                    | Thyroglobulin   | Taqman         | Mm00447525_m1                       |                                 |        |
|                    | TTF-1           | Taqman         | Mm00657018_m1                       |                                 |        |
|                    | Adrenomedullin2 | Taqman         | Mm00812850_g1                       |                                 |        |
|                    | Cd209a          | Taqman         | Mm00460067_m1                       |                                 |        |
|                    | Fbp1            | Taqman         | Mm00490181_m1                       |                                 |        |
|                    | Rgs7            | Taqman         | Mm01317058_m1                       |                                 |        |
|                    | 18S             | Taqman         | cat# 4308329                        |                                 |        |

**Supplementary Table 2**

|                   | Antibody                           | company                     | catalogue number | species | WB      | IHC or IF |
|-------------------|------------------------------------|-----------------------------|------------------|---------|---------|-----------|
| Primary           | Akt (total)                        | Cell Signaling Technologies | 9272             | rabbit  | 2,000 x |           |
|                   | Akt1                               | BD Biosciences              | 610860           | mouse   | 1,000 x | 100 x     |
|                   | Akt2                               | Upstate Biotechnology       | 06-606           | sheep   | 1,000 x | 100 x     |
|                   | Akt3                               | Santa Cruz Biotechnology    | sc-11520         | goat    | 1,000 x | 100 x     |
|                   | phospho Ser473-Akt                 | Santa Cruz Biotechnology    | sc-7985-R        | rabbit  |         | 100 x     |
|                   | GAPDH                              | Cell Signaling Technologies | 2118             | rabbit  | 2,000 x |           |
|                   | Ki67                               | Abcam                       | ab16667          | rabbit  |         | 200 x     |
|                   | Cleaved Caspase-3                  | Cell Signaling Technologies | 9579             | rabbit  |         | 800 x     |
|                   | Adrenomedulin 2                    | Santa Cruz Biotechnology    | sc-86272         | rabbit  |         | 100 x     |
|                   | CD209a                             | Invitrogen                  | MA1-25615        | mouse   |         | 100 x     |
|                   | CD205                              | Origene                     | TA323022         | rabbit  |         | 50 x      |
|                   | CD317                              | Origene                     | TA337141         | rabbit  |         | 100 x     |
|                   | F4/80                              | Thermo Fisher, Incorporatio | MF48000          | rat     |         | 400 x     |
| Secondary for WB  | Anti rabbit IgG linked with HRP    | Cell Signaling Technologies | 7074             | mouse   | 2,000 x |           |
|                   | Anti mouse IgG linked with HRP     | Cell Signaling Technologies | 7076             | horse   | 2,000 x |           |
|                   | Anti goat IgG linked with HRP      | Santa Cruz Biotechnology    | sc-2768          | rabbit  | 2,000 x |           |
|                   | Anti sheep IgG linked with HRP     | Upstate Biotechnology       | 12-342           | rabbit  | 2,000 x |           |
| Secondary for IHC | Biotinylated anti rabbit IgG (H+L) | Thermo Fisher, Incorporatio | BA-1000          | goat    |         | 500 x     |
|                   | Biotinylated anti mouse IgG (H+L)  | Thermo Fisher, Incorporatio | BA-2000          | horse   |         | 500 x     |
|                   | Biotinylated anti goat IgG (H+L)   | Thermo Fisher, Incorporatio | BA-5000          | rabbit  |         | 500 x     |
|                   | Biotinylated anti rat IgG (H+L)    | Thermo Fisher, Incorporatio | BA-9401          | goat    |         | 500 x     |
| Secondary for IF  | Alexa Fluor 488 antigoat IgG (H+L) | Thermo Fisher, Incorporatio | A110555          | donky   |         | 2,000 x   |
|                   | Alexa Fluor 594 antigoat IgG (H+L) | Thermo Fisher, Incorporatio | A11037           | goat    |         | 2,000 x   |

### Supplementary Table 3

| genotype    | TSH level (compare to the level in PVPV-AktWT) | p-value vs PVPV-AktWT |
|-------------|------------------------------------------------|-----------------------|
| PVPV-AktWT  | 1                                              |                       |
| PVPV-Akt1KO | 1.41 ± 0.19                                    | 0.16                  |
| PVPV-Akt2KO | 1.28 ± 0.20                                    | 0.17                  |
| PVPV-Akt3KO | 1.60 ± 0.07                                    | 0.06                  |

**Supplemental Table 3. TSH levels in PVPV-AktWT and isoform-specific knock out mice**

**with PVPV gene:** TSH levels in mouse serum was measured by using mouse TSH kit and normalized to the average levels in PVPV-AktWT mice. Data were expressed average ± standard deviation. Statistics for difference in each isoform-specific Akt was initially analyzed by one-way ANOVA and significance between groups were examined by non-parametric, Mann Whitney, test.

Table 4: All Probes

| Probe_Set | order | Akt1     | Akt2     | Akt3     | AktW     | Akt1_WT  | p_Akt1WT | Akt2_WT  | p_Akt2WT | Akt3_WT  | p_Akt3WT | Akt2_3   | p_Akt2_3 | Akt1_2   | p_Akt1_2 | Akt1_3   | p_Akt1_3 | Probe_Set | X1017    | X1031    | X1109    | X1646    | X2037    | X2603    | X2564    | X2307    | X2780    | X1115    | X1118    | X1060    | Gene_Symbol | mRNA_Accession |
|-----------|-------|----------|----------|----------|----------|----------|----------|----------|----------|----------|----------|----------|----------|----------|----------|----------|----------|-----------|----------|----------|----------|----------|----------|----------|----------|----------|----------|----------|----------|----------|-------------|----------------|
| 6747308   | 1     | 8.494233 | 8.542226 | 8.450806 | 8.534077 | -0.03984 | 0.660156 | 0.008149 | 0.927911 | -0.08327 | 0.367977 | 0.09142  | 0.325506 | -0.04799 | 0.597413 | 0.043427 | 0.632178 | 6747308   | 8.509191 | 8.378276 | 8.595231 | 8.411058 | 8.605799 | 8.609821 | 8.545611 | 8.444447 | 8.362359 | 8.41614  | 8.548263 | 8.637829 | Lypla1      | NM_008866      |
| 6747309   | 2     | 7.832282 | 7.946847 | 7.839986 | 7.628717 | 0.203565 | 0.180354 | 0.318129 | 0.050962 | 0.211269 | 0.166185 | 0.106861 | 0.463152 | -0.11456 | 0.432723 | -0.0077  | 0.957064 | 6747309   | 7.986978 | 7.748579 | 7.761289 | 7.944989 | 8.001403 | 7.894148 | 8.011369 | 7.728848 | 7.779741 | 7.414151 | 7.542768 | 7.929233 | Tcea1       | NM_011541      |
| 6747314   | 3     | 8.277211 | 8.283995 | 8.150393 | 8.440146 | -0.16294 | 0.43091  | -0.15615 | 0.449608 | -0.28975 | 0.178443 | 0.133602 | 0.515627 | -0.00678 | 0.973298 | 0.126819 | 0.536623 | 6747314   | 8.422976 | 8.162178 | 8.24648  | 8.375996 | 8.149172 | 8.326817 | 8.299503 | 8.257132 | 7.894543 | 8.094354 | 8.367355 | 8.85873  | Atp6v1h     | NM_133826      |
| 6747343   | 5     | 8.233388 | 8.484023 | 8.369852 | 8.331735 | -0.09835 | 0.309842 | 0.152288 | 0.131676 | 0.038117 | 0.685374 | 0.114171 | 0.24362  | -0.25063 | 0.024553 | -0.13646 | 0.170867 | 6747343   | 8.085777 | 8.352393 | 8.261995 | 8.373574 | 8.508552 | 8.569943 | 8.46137  | 8.319905 | 8.328281 | 8.219454 | 8.459518 | 8.316233 | Rb1cc1      | NM_009826      |
| 6747364   | 7     | 9.89663  | 9.999408 | 10.03154 | 9.997929 | -0.1013  | 0.423767 | 0.001479 | 0.990482 | 0.033614 | 0.786804 | -0.03213 | 0.795932 | -0.10278 | 0.417312 | -0.13491 | 0.294167 | 6747364   | 9.85487  | 9.957383 | 9.877636 | 9.886991 | 9.989443 | 10.12179 | 10.24846 | 9.983746 | 9.862423 | 9.868871 | 9.926656 | 10.19826 | Pcmdt1      | NM_183028      |
| 6747471   | 8     | 7.933488 | 7.877622 | 7.900825 | 8.088712 | -0.15522 | 0.468118 | -0.21109 | 0.330591 | -0.18789 | 0.383524 | -0.0232  | 0.912156 | 0.055866 | 0.790931 | 0.032663 | 0.87664  | 6747471   | 7.848469 | 7.959668 | 7.992327 | 7.709755 | 7.813577 | 8.109533 | 7.826788 | 7.90558  | 7.970108 | 8.456914 | 7.598595 | 8.210627 | Rrs1        | NM_021511      |
| 6747472   | 9     | 6.443882 | 6.675383 | 6.471971 | 7.065965 | -0.62208 | 0.086218 | -0.39058 | 0.254362 | -0.59399 | 0.09879  | 0.203412 | 0.540367 | -0.2315  | 0.487476 | -0.02809 | 0.931801 | 6747472   | 6.134744 | 6.562011 | 6.634891 | 7.05863  | 6.398019 | 6.569499 | 6.424033 | 6.548404 | 6.443476 | 6.795094 | 6.603899 | 7.798903 | Adhfe1      | NM_175236      |
| 6747497   | 11    | 7.0958   | 6.979269 | 6.998483 | 6.465665 | 0.630135 | 0.026633 | 0.513605 | 0.058141 | 0.532818 | 0.051106 | -0.01921 | 0.936161 | 0.116531 | 0.62968  | 0.097317 | 0.686504 | 6747497   | 7.214514 | 7.012691 | 7.060195 | 6.890254 | 7.19825  | 6.849304 | 7.312871 | 6.846076 | 6.836501 | 6.04826  | 6.942533 | 6.406201 | Sgk3        | NM_133220      |
| 6747515   | 13    | 8.338779 | 8.335788 | 8.129769 | 8.26039  | 0.07839  | 0.426563 | 0.075399 | 0.443729 | -0.13062 | 0.200321 | 0.206019 | 0.058869 | 0.002991 | 0.975287 | 0.20901  | 0.056006 | 6747515   | 8.337455 | 8.233233 | 8.44565  | 8.25795  | 8.470444 | 8.278971 | 7.976404 | 8.20178  | 8.211124 | 8.245715 | 8.169055 | 8.366399 | Cssp1       | NM_026493      |
| 6747641   | 15    | 7.683186 | 7.745018 | 7.185881 | 6.891996 | 0.79119  | 0.099808 | 0.853022 | 0.079744 | 0.293885 | 0.509004 | 0.559137 | 0.224939 | -0.06183 | 0.887974 | 0.497305 | 0.275821 | 6747641   | 7.619622 | 8.212584 | 7.217352 | 7.642867 | 8.354205 | 7.237982 | 7.678856 | 6.672298 | 7.206488 | 6.75831  | 7.456565 | 6.461113 | Sulf1       | NM_172294      |
| 6747786   | 17    | 7.90358  | 7.967006 | 7.7787   | 7.722602 | 0.08978  | 0.240299 | 0.244403 | 0.125065 | 0.056098 | 0.704452 | 0.188305 | 0.223411 | -0.06343 | 0.668429 | 0.12488  | 0.406936 | 6747786   | 7.871547 | 7.924078 | 7.915115 | 7.698376 | 8.12375  | 8.078891 | 7.954762 | 7.574466 | 7.806873 | 7.636256 | 7.609635 | 7.921916 | Terf1       | NM_009352      |
| 6747805   | 18    | 9.798073 | 9.568034 | 9.630789 |          |          |          |          |          |          |          |          |          |          |          |          |          |           |          |          |          |          |          |          |          |          |          |          |          |          |             |                |

|         |     |          |          |          |          |          |          |          |          |          |          |          |          |          |          |          |          |         |          |          |          |          |          |          |          |          |          |          |          |          |          |              |
|---------|-----|----------|----------|----------|----------|----------|----------|----------|----------|----------|----------|----------|----------|----------|----------|----------|----------|---------|----------|----------|----------|----------|----------|----------|----------|----------|----------|----------|----------|----------|----------|--------------|
| 6749473 | 93  | 6.411613 | 6.440617 | 6.486913 | 6.618841 | -0.20723 | 0.238814 | -0.17822 | 0.305511 | -0.13193 | 0.441185 | -0.0463  | 0.783356 | -0.029   | 0.86303  | -0.0753  | 0.656032 | 6749473 | 6.223257 | 6.295343 | 6.716238 | 6.493752 | 6.421295 | 6.406805 | 6.694788 | 6.328449 | 6.437502 | 6.417747 | 6.577057 | 6.861718 | Osgepl1  | NM_028091    |
| 6749557 | 95  | 8.561286 | 8.520758 | 8.291552 | 8.606235 | -0.04495 | 0.811563 | -0.08548 | 0.651856 | -0.31468 | 0.122782 | 0.229206 | 0.244365 | 0.040529 | 0.829737 | 0.269735 | 0.177471 | 6749557 | 8.729457 | 8.515006 | 8.439396 | 8.350733 | 8.784735 | 8.426805 | 8.349049 | 8.56764  | 7.957966 | 8.521386 | 8.798605 | 8.498715 | Coq10b   | NM_001039710 |
| 6749572 | 96  | 9.624705 | 9.579304 | 9.549451 | 9.639993 | -0.01529 | 0.866561 | -0.06069 | 0.510437 | -0.09054 | 0.334205 | 0.029853 | 0.743474 | 0.045401 | 0.620293 | 0.075254 | 0.417897 | 6749572 | 9.624962 | 9.619083 | 9.63007  | 9.460232 | 9.649475 | 9.628205 | 9.530935 | 9.744543 | 9.372876 | 9.608701 | 9.672312 | 9.638966 | Mobk13   | NM_025283    |
| 6749581 | 97  | 7.78618  | 7.625929 | 7.748529 | 7.775577 | 0.010603 | 0.92893  | -0.14965 | 0.230108 | -0.02705 | 0.820261 | -0.1226  | 0.318274 | 0.160251 | 0.20166  | 0.037651 | 0.752176 | 6749581 | 7.723557 | 7.687561 | 7.947421 | 7.453932 | 7.737804 | 7.68605  | 7.941892 | 7.695093 | 7.608601 | 7.798851 | 7.845325 | 7.682555 | Mars2    | NM_175439    |
| 6749676 | 98  | 6.429063 | 6.677483 | 6.596717 | 6.478038 | -0.04897 | 0.680106 | 0.199445 | 0.119674 | 0.11868  | 0.33024  | 0.080766 | 0.500559 | -0.24842 | 0.061838 | -0.16765 | 0.181255 | 6749676 | 6.376017 | 6.422899 | 6.488273 | 6.58065  | 6.783384 | 6.668415 | 6.765742 | 6.480187 | 6.544223 | 6.322618 | 6.39902  | 6.712475 | 9430016H | BC071241     |
| 6749691 | 99  | 6.860558 | 6.923444 | 6.748807 | 6.508535 | 0.352024 | 0.137641 | 0.414909 | 0.087769 | 0.240272 | 0.292847 | 0.174637 | 0.436858 | -0.06289 | 0.775742 | 0.111752 | 0.614706 | 6749691 | 6.911244 | 7.006770 | 6.663724 | 6.976044 | 7.308145 | 6.486142 | 6.950075 | 6.546192 | 6.750153 | 6.430307 | 6.707469 | 6.387828 | 2810022L | NM_144882    |
| 6749701 | 100 | 6.251154 | 6.521789 | 6.110361 | 5.846929 | 0.404225 | 0.201064 | 0.67486  | 0.048472 | 0.263432 | 0.390455 | 0.411428 | 0.193951 | -0.27064 | 0.378246 | 0.140793 | 0.640515 | 6749701 | 6.115094 | 6.068306 | 6.570062 | 6.193435 | 7.004426 | 6.367507 | 6.448713 | 5.55454  | 6.32783  | 5.92765  | 5.882605 | 5.730533 | Sgol2    | NM_199007    |
| 6749702 | 101 | 8.214419 | 8.121396 | 7.843128 | 7.606656 | 0.607762 | 0.044028 | 0.51474  | 0.077808 | 0.236471 | 0.380096 | 0.278268 | 0.306156 | 0.093023 | 0.724268 | 0.371291 | 0.182801 | 6749702 | 8.484587 | 8.093957 | 8.064712 | 8.204103 | 8.27998  | 7.880105 | 8.039455 | 7.413235 | 8.076693 | 7.253453 | 7.546135 | 8.020381 | Aox1     | NM_009676    |
| 6749720 | 105 | 7.084392 | 7.101572 | 7.167761 | 7.030147 | 0.054244 | 0.527952 | 0.071425 | 0.410316 | 0.137613 | 0.132723 | -0.06619 | 0.444076 | -0.01718 | 0.839706 | -0.08337 | 0.340279 | 6749720 | 7.052184 | 7.126936 | 7.074055 | 6.966673 | 7.191652 | 7.146391 | 7.11201  | 7.289937 | 7.101335 | 6.895412 | 7.08831  | 7.10672  | Nif31i   | NM_022988    |
| 6749727 | 106 | 10.32934 | 10.55995 | 10.37105 | 10.38609 | -0.05674 | 0.803843 | 0.173867 | 0.4541   | -0.01504 | 0.947414 | 0.188907 | 0.417522 | -0.23061 | 0.327215 | -0.0417  | 0.855021 | 6749727 | 10.31087 | 10.40413 | 10.27303 | 10.59718 | 10.45768 | 10.625   | 10.52818 | 10.29727 | 10.28769 | 9.877478 | 10.37984 | 10.90094 | Ndufb3   | NM_025597    |
| 6749734 | 107 | 8.642977 | 8.694169 | 8.589888 | 8.651238 | -0.00826 | 0.926368 | 0.042931 | 0.633464 | -0.06135 | 0.498869 | 0.104281 | 0.263014 | -0.05119 | 0.57082  | 0.05309  | 0.556936 | 6749734 | 8.765772 | 8.641603 | 8.521557 | 8.607809 | 8.81928  | 8.655418 | 8.598794 | 8.700678 | 8.470191 | 8.574224 | 8.687274 | 8.692215 | Cflar    | NM_207653    |
| 6749735 | 108 | 8.454353 | 8.54623  | 8.188296 | 8.406297 | 0.048055 | 0.797336 | 0.139933 | 0.461681 | -0.218   | 0.262839 | 0.357935 | 0.083362 | -0.09188 | 0.625417 | 0.266057 | 0.179775 | 6749735 | 8.551698 | 8.500531 | 8.310829 | 8.434403 | 8.590981 | 8.613307 | 7.987817 | 8.651012 | 7.926058 | 8.31     |          |          |          |              |

|         |     |          |          |          |          |          |          |          |          |          |          |          |          |          |          |          |          |         |          |          |          |          |          |          |          |          |          |          |          |          |        |           |
|---------|-----|----------|----------|----------|----------|----------|----------|----------|----------|----------|----------|----------|----------|----------|----------|----------|----------|---------|----------|----------|----------|----------|----------|----------|----------|----------|----------|----------|----------|----------|--------|-----------|
| 6751103 | 178 | 6.303327 | 6.265211 | 5.797954 | 5.488217 | 0.815109 | 0.023235 | 0.776993 | 0.028446 | 0.309737 | 0.31856  | 0.467256 | 0.147273 | 0.038116 | 0.899098 | 0.505372 | 0.12089  | 6751103 | 6.453273 | 5.836732 | 6.619975 | 6.065536 | 6.607528 | 6.122568 | 6.033546 | 5.336049 | 6.024268 | 5.741482 | 5.565961 | 5.157209 | Ccl20  | NM_016960 |
| 6751215 | 180 | 7.908533 | 8.150764 | 8.000659 | 8.425321 | -0.51679 | 0.003571 | -0.27456 | 0.062431 | -0.42466 | 0.010132 | 0.150105 | 0.270802 | -0.24223 | 0.092685 | -0.09213 | 0.488529 | 6751215 | 7.838866 | 7.836821 | 8.049913 | 8.296547 | 8.180868 | 7.974877 | 7.910656 | 8.107039 | 7.984282 | 8.398986 | 8.227041 | 8.649935 | Fbxo36 | NM_025386 |
| 6751219 | 181 | 8.047088 | 7.808636 | 7.903575 | 7.21053  | 0.836558 | 0.012374 | 0.598107 | 0.050712 | 0.693045 | 0.028737 | -0.09494 | 0.724861 | 0.238451 | 0.386574 | 0.143513 | 0.596588 | 6751219 | 8.142446 | 8.190365 | 7.808452 | 7.831471 | 8.167148 | 7.42729  | 8.064993 | 7.55253  | 8.093201 | 6.788349 | 7.420959 | 7.422281 | Sp100  | NM_013673 |
| 6751226 | 182 | 9.301317 | 9.46289  | 9.357167 | 9.279559 | 0.021758 | 0.823748 | 0.183331 | 0.088447 | 0.077608 | 0.435465 | 0.105723 | 0.295878 | -0.16157 | 0.125806 | -0.05585 | 0.570981 | 6751226 | 9.253884 | 9.248791 | 9.401277 | 9.436423 | 9.576853 | 9.375395 | 9.512977 | 9.307752 | 9.250772 | 9.336134 | 9.369724 | 9.13282  | Cab39  | NM_133781 |
| 6751231 | 183 | 10.2875  | 10.36815 | 10.33102 | 10.25498 | 0.032527 | 0.772569 | 0.113173 | 0.328618 | 0.076043 | 0.504366 | 0.03713  | 0.741668 | -0.08065 | 0.479699 | -0.04352 | 0.699619 | 6751231 | 10.42333 | 10.29893 | 10.14025 | 10.31926 | 10.34274 | 10.44245 | 10.56983 | 10.26647 | 10.15676 | 10.28803 | 10.23867 | 10.23823 | Itm2c  | NM_022417 |
| 6751264 | 185 | 6.365118 | 6.391372 | 6.353153 | 6.34219  | 0.022928 | 0.484672 | 0.049182 | 0.154688 | 0.010963 | 0.735152 | 0.038219 | 0.256746 | -0.02625 | 0.425866 | 0.011966 | 0.712153 | 6751264 | 6.412418 | 6.34039  | 6.342547 | 6.410311 | 6.415774 | 6.348031 | 6.402988 | 6.35184  | 6.30463  | 6.357852 | 6.347655 | 6.321063 | Psmid1 | NM_027357 |
| 6751271 | 186 | 7.358028 | 7.398169 | 7.444451 | 7.574437 | -0.21641 | 0.354586 | -0.17627 | 0.446632 | -0.12999 | 0.571351 | -0.04628 | 0.838812 | -0.04014 | 0.859912 | -0.08642 | 0.70501  | 6751271 | 7.374418 | 7.27464  | 7.425025 | 7.413158 | 7.295874 | 7.485476 | 7.490622 | 7.805294 | 7.037437 | 7.741378 | 7.165192 | 7.816741 | B3gnt7 | NM_145222 |
| 6751300 | 187 | 7.502559 | 7.449307 | 7.544536 | 7.321806 | 0.180753 | 0.077838 | 0.127501 | 0.191652 | 0.22273  | 0.037443 | -0.09523 | 0.31788  | 0.053252 | 0.567873 | -0.04198 | 0.651217 | 6751300 | 7.420933 | 7.508319 | 7.578424 | 7.382966 | 7.578687 | 7.386268 | 7.688231 | 7.450381 | 7.494995 | 7.260251 | 7.250866 | 7.454301 | Cops7b | NM_172974 |
| 6751304 | 188 | 7.834145 | 7.813818 | 7.736404 | 7.75243  | 0.081715 | 0.32026  | 0.061388 | 0.448985 | -0.01603 | 0.84057  | 0.077414 | 0.344846 | 0.020327 | 0.798764 | 0.09774  | 0.240649 | 6751304 | 7.771595 | 7.854104 | 7.876735 | 7.832033 | 7.846996 | 7.762425 | 7.789474 | 7.700618 | 7.719121 | 7.558091 | 7.841892 | 7.857307 | Dis3l2 | NM_153530 |
| 6751332 | 192 | 8.650907 | 8.56604  | 8.416783 | 8.496316 | 0.154591 | 0.145313 | 0.069724 | 0.48755  | -0.07953 | 0.430569 | 0.149257 | 0.157904 | 0.084868 | 0.401593 | 0.234125 | 0.040343 | 6751332 | 8.618567 | 8.647929 | 8.686226 | 8.42152  | 8.812839 | 8.46376  | 8.397859 | 8.502275 | 8.350214 | 8.448021 | 8.518306 | 8.522621 | Eif4e2 | NM_023314 |
| 6751338 | 194 | 8.398495 | 8.458455 | 8.329082 | 8.372065 | 0.02643  | 0.599507 | 0.08639  | 0.111766 | -0.04298 | 0.399907 | 0.129373 | 0.0281   | -0.05996 | 0.250033 | 0.069413 | 0.188994 | 6751338 | 8.42588  | 8.401468 | 8.368138 | 8.353578 | 8.521101 | 8.500686 | 8.291454 | 8.343639 | 8.352154 | 8.318223 | 8.438684 | 8.359289 | Gigyf2 | NM_146112 |
| 6751344 | 196 | 7.958069 | 7.996805 | 8.104577 | 7.336029 | 0.622039 | 0.024342 | 0.660776 | 0.018675 | 0.768547 | 0.009075 | -0.10777 | 0.644274 | -0.03874 | 0.867388 | -0.14651 | 0.532601 | 6751344 | 8.221005 | 7.863196 | 7.790005 | 7.976853 | 8.274174 | 7.739388 | 8.368352 | 7.818952 | 8.126426 | 7.394961 |          |          |        |           |

|         |     |          |          |          |          |          |          |          |          |          |          |          |          |          |          |          |          |         |          |          |          |          |          |          |          |          |          |          |          |          |          |              |
|---------|-----|----------|----------|----------|----------|----------|----------|----------|----------|----------|----------|----------|----------|----------|----------|----------|----------|---------|----------|----------|----------|----------|----------|----------|----------|----------|----------|----------|----------|----------|----------|--------------|
| 6752988 | 270 | 7.431756 | 7.692871 | 7.197161 | 7.56626  | -0.1345  | 0.613085 | 0.126611 | 0.63375  | -0.3691  | 0.186814 | 0.49571  | 0.088491 | -0.26112 | 0.336984 | 0.234595 | 0.385654 | 6752988 | 7.046781 | 7.298987 | 7.9495   | 8.080972 | 7.44345  | 7.554191 | 7.078536 | 7.067534 | 7.445413 | 7.67706  | 7.57197  | 7.449749 | AA986860 | NM_177604    |
| 6752994 | 271 | 5.94879  | 6.395666 | 6.22955  | 5.558186 | 0.390604 | 0.348885 | 0.83748  | 0.065456 | 0.671364 | 0.125607 | 0.166116 | 0.683336 | -0.44688 | 0.287926 | -0.28076 | 0.49484  | 6752994 | 5.778744 | 5.862761 | 6.204865 | 6.583739 | 6.35179  | 6.251469 | 7.015903 | 5.344098 | 6.32865  | 5.874337 | 5.65238  | 5.147842 | Fcamr    | NM_144960    |
| 6753003 | 272 | 5.963893 | 7.576052 | 6.38254  | 6.202175 | -0.23828 | 0.761113 | 1.373877 | 0.107247 | 0.180365 | 0.817763 | 1.193511 | 0.153727 | -1.61216 | 0.065946 | -0.41865 | 0.595548 | 6753003 | 5.944891 | 5.793214 | 6.153574 | 9.323568 | 6.705071 | 6.699516 | 7.345683 | 5.547887 | 6.254051 | 6.705018 | 6.280741 | 5.620766 | Pigr     | NM_011082    |
| 6753033 | 274 | 7.676028 | 7.607286 | 7.662215 | 7.435271 | 0.240757 | 0.017227 | 0.172014 | 0.064859 | 0.226944 | 0.022415 | -0.05493 | 0.513833 | 0.068743 | 0.417478 | 0.013813 | 0.867874 | 6753033 | 7.643383 | 7.645    | 7.739702 | 7.587749 | 7.710553 | 7.523555 | 7.79285  | 7.526261 | 7.667534 | 7.348849 | 7.536239 | 7.420726 | Lgtm     | NM_001136070 |
| 6753068 | 277 | 7.18607  | 7.032512 | 7.070648 | 6.274439 | 0.91163  | 0.029818 | 0.758072 | 0.059602 | 0.796208 | 0.050175 | -0.03814 | 0.914855 | 0.153558 | 0.668593 | 0.115422 | 0.746992 | 6753068 | 7.337169 | 7.153549 | 7.067491 | 7.007054 | 7.357549 | 6.732932 | 7.531069 | 6.429967 | 7.250907 | 6.042087 | 6.871985 | 5.909246 | 5430435G | NM_145509    |
| 6753083 | 279 | 9.727959 | 9.760297 | 9.736516 | 10.04552 | -0.31756 | 0.101241 | -0.28522 | 0.134891 | -0.309   | 0.109282 | 0.023782 | 0.893148 | -0.03234 | 0.855142 | -0.00856 | 0.961433 | 6753083 | 9.713614 | 9.786657 | 9.683605 | 9.799136 | 9.786732 | 9.695024 | 9.538461 | 10.01249 | 9.658596 | 9.815588 | 9.895761 | 10.42521 | Slc41a1  | NM_173865    |
| 6753084 | 280 | 7.352001 | 7.381977 | 7.180911 | 7.122181 | 0.22982  | 0.023037 | 0.259796 | 0.013189 | 0.05873  | 0.493959 | 0.201066 | 0.039712 | -0.02998 | 0.723996 | 0.17109  | 0.070256 | 6753084 | 7.427259 | 7.327502 | 7.301242 | 7.353903 | 7.519542 | 7.272487 | 7.198906 | 7.116827 | 7.227    | 7.058667 | 7.271063 | 7.036814 | Rab7l1   | NM_144875    |
| 6753085 | 281 | 9.593621 | 9.679622 | 9.609579 | 9.661378 | -0.06776 | 0.482608 | 0.018244 | 0.847803 | -0.0518  | 0.588958 | 0.070043 | 0.468442 | -0.086   | 0.377398 | -0.01596 | 0.866647 | 6753085 | 9.681206 | 9.631472 | 9.468186 | 9.596216 | 9.662376 | 9.780275 | 9.706016 | 9.530878 | 9.591843 | 9.53674  | 9.622946 | 9.824449 | Nucks1   | NM_175294    |
| 6753089 | 282 | 5.988778 | 6.074649 | 5.887404 | 6.154878 | -0.1661  | 0.391183 | -0.08023 | 0.673093 | -0.26747 | 0.182504 | 0.187245 | 0.336759 | -0.08587 | 0.651845 | 0.101374 | 0.59523  | 6753089 | 5.984038 | 6.018239 | 5.964057 | 6.255269 | 5.864159 | 6.10452  | 6.12775  | 5.916314 | 5.618149 | 6.035008 | 5.922445 | 6.50718  | Slc45a3  | NM_145977    |
| 6753091 | 283 | 9.557451 | 9.546078 | 9.355905 | 9.282072 | 0.275379 | 0.002513 | 0.264006 | 0.003205 | 0.073833 | 0.279158 | 0.190173 | 0.017332 | 0.011373 | 0.862522 | 0.201546 | 0.013216 | 6753091 | 9.573981 | 9.536336 | 9.562037 | 9.523624 | 9.59949  | 9.51512  | 9.242194 | 9.474664 | 9.350858 | 9.205523 | 9.382139 | 9.258555 | Elk4     | NM_007923    |
| 6753108 | 284 | 7.730496 | 8.010873 | 8.172118 | 7.738043 | -0.00755 | 0.96276  | 0.27283  | 0.119774 | 0.434075 | 0.02427  | -0.16124 | 0.333482 | -0.28038 | 0.111298 | -0.44162 | 0.022533 | 6753108 | 7.611806 | 7.927617 | 7.652065 | 8.10754  | 8.053003 | 7.872076 | 8.036188 | 8.148292 | 8.331873 | 7.412048 | 7.877867 | 7.924214 | Klhdc8a  | NM_144810    |
| 6753110 | 285 | 8.001126 | 8.533128 | 8.312635 | 8.439353 | -0.43823 | 0.05461  | 0.093775 | 0.643149 | -0.12672 | 0.533621 | 0.220493 | 0.230489 | -0.532   | 0.025811 | -0.31151 | 0.148481 | 6753110 | 7.767115 | 8.262209 | 7.974053 | 8.638062 | 8.435947 | 8.525376 | 8.325076 | 8.182678 | 8.430151 | 8.274499 | 8.175642 | 8.867919 | Nuak2    | NM_          |

|         |     |          |          |          |          |          |          |          |          |          |          |          |          |          |          |          |          |          |          |          |          |          |          |          |          |          |          |          |          |          |           |           |
|---------|-----|----------|----------|----------|----------|----------|----------|----------|----------|----------|----------|----------|----------|----------|----------|----------|----------|----------|----------|----------|----------|----------|----------|----------|----------|----------|----------|----------|----------|----------|-----------|-----------|
| 6754669 | 365 | 7.692208 | 7.858131 | 7.78346  | 7.638741 | 0.053467 | 0.615822 | 0.21939  | 0.064591 | 0.144719 | 0.195403 | 0.074671 | 0.486797 | -0.16592 | 0.143923 | -0.09125 | 0.399001 | 6754669  | 7.761498 | 7.636283 | 7.678844 | 7.835359 | 8.043027 | 7.696007 | 7.967169 | 7.699183 | 7.684028 | 7.632386 | 7.69673  | 7.587108 | Scyl3     | NM_028776 |
| 6754671 | 366 | 5.63869  | 6.14894  | 6.359189 | 5.908412 | -0.26972 | 0.38867  | 0.240528 | 0.439825 | 0.450777 | 0.16617  | -0.21025 | 0.497569 | -0.51025 | 0.122932 | -0.7205  | 0.040891 | 6754671  | 5.04241  | 5.66675  | 6.20691  | 6.016544 | 6.257824 | 6.172451 | 6.493308 | 6.468593 | 6.115666 | 5.511853 | 6.016006 | 6.197377 | 28104220  | BC052693  |
| 6754680 | 367 | 6.690076 | 5.848513 | 6.077063 | 5.624948 | 1.065128 | 0.019163 | 0.223565 | 0.556389 | 0.452115 | 0.249654 | -0.22855 | 0.547822 | 0.841563 | 0.049646 | 0.613013 | 0.130863 | 6754680  | 7.434578 | 6.484098 | 6.151553 | 5.956962 | 6.010113 | 5.578464 | 6.57079  | 5.5064   | 6.154    | 5.582636 | 5.736599 | 5.555609 | Sele      | NM_011345 |
| 6754681 | 368 | 6.207169 | 5.863976 | 5.988423 | 5.946467 | 0.260702 | 0.210138 | -0.08249 | 0.677749 | 0.041956 | 0.831922 | -0.12445 | 0.53365  | 0.343192 | 0.110612 | 0.218746 | 0.285979 | 6754681  | 6.67759  | 5.926641 | 6.017275 | 5.715644 | 5.966932 | 5.909353 | 6.16847  | 5.87184  | 5.924958 | 5.878467 | 5.90428  | 6.056654 | Sell      | NM_011346 |
| 6754690 | 369 | 8.239226 | 7.297237 | 7.074631 | 5.633562 | 2.605664 | 0.006174 | 1.663675 | 0.046475 | 1.441069 | 0.075907 | 0.222606 | 0.760954 | 0.941989 | 0.219494 | 1.164594 | 0.13817  | 6754690  | 9.612606 | 7.660061 | 7.44501  | 7.605494 | 7.617143 | 6.669074 | 7.949172 | 5.91332  | 7.361402 | 5.148389 | 5.933802 | 5.818495 | Selp      | NM_011347 |
| 6754691 | 370 | 6.700682 | 7.057943 | 6.938497 | 6.708283 | -0.0076  | 0.988903 | 0.34966  | 0.527734 | 0.230214 | 0.675333 | 0.119446 | 0.827249 | -0.35726 | 0.519037 | 0.665377 | 6754691  | 6.859518 | 6.155281 | 7.087248 | 6.45644  | 7.946874 | 6.770515 | 7.451603 | 6.869489 | 6.494399 | 7.207184 | 5.817848 | 7.098817 | F5       | NM_007976 |           |
| 6754696 | 371 | 6.960524 | 6.960077 | 6.896697 | 6.932853 | 0.02767  | 0.873247 | 0.027724 | 0.875272 | -0.03616 | 0.834964 | 0.06338  | 0.715756 | 0.000447 | 0.997943 | 0.063827 | 0.713858 | 6754696  | 7.074419 | 6.871158 | 6.935994 | 6.81053  | 7.194617 | 6.875084 | 7.0477   | 7.002769 | 6.639622 | 6.636761 | 7.100888 | 7.060911 | Slc19a2   | NM_004087 |
| 6754700 | 372 | 7.19888  | 7.358969 | 7.266915 | 7.219599 | -0.02072 | 0.880069 | 0.13937  | 0.325331 | 0.047316 | 0.731231 | 0.092054 | 0.508457 | -0.16009 | 0.263139 | -0.06804 | 0.622805 | 6754700  | 7.039599 | 7.244147 | 7.312893 | 7.481083 | 7.377928 | 7.217896 | 7.463842 | 7.192957 | 7.143945 | 7.095535 | 7.116954 | 7.446307 | 4930455F  | NM_029115 |
| 6754701 | 373 | 7.604779 | 7.633171 | 7.571473 | 7.390575 | 0.214204 | 0.111561 | 0.242597 | 0.077441 | 0.180899 | 0.169463 | 0.061698 | 0.620453 | -0.02839 | 0.818603 | 0.033305 | 0.788045 | 6754701  | 7.518209 | 7.615009 | 7.681118 | 7.40184  | 7.82901  | 7.668664 | 7.694818 | 7.465007 | 7.554595 | 7.514459 | 7.417509 | 7.239756 | Nme7      | NM_138314 |
| 6754735 | 374 | 8.458646 | 8.150592 | 7.503541 | 6.93556  | 1.523086 | 0.040036 | 1.215032 | 0.086562 | 0.567981 | 0.387905 | 0.647051 | 0.328679 | 0.308054 | 0.633768 | 0.955105 | 0.163243 | 6754735  | 8.311688 | 8.336329 | 8.727921 | 8.179966 | 8.974098 | 7.297712 | 8.311641 | 7.313252 | 6.885729 | 5.891138 | 7.916583 | 6.998958 | Dpt       | NM_019759 |
| 6754798 | 377 | 9.909359 | 9.836305 | 10.0058  | 10.15431 | -0.24495 | 0.16387  | -0.318   | 0.081783 | -0.14851 | 0.379926 | -0.1695  | 0.319826 | 0.073054 | 0.659731 | -0.09644 | 0.562896 | 6754798  | 10.04885 | 9.986865 | 9.692361 | 9.794455 | 9.9016   | 9.812859 | 10.16498 | 9.912196 | 9.940229 | 9.930447 | 10.02773 | 10.50475 | Creg1     | NM_011804 |
| 6754842 | 380 | 7.277095 | 7.413412 | 7.35731  | 7.213688 | 0.063408 | 0.579838 | 0.199724 | 0.10669  | 0.143622 | 0.227581 | 0.056102 | 0.623499 | -0.13632 | 0.249985 | -0.08021 | 0.486282 | 6754842  | 7.247355 | 7.303655 | 7.280276 | 7.323714 | 7.543322 | 7.373199 | 7.445344 | 7.365401 | 7.261184 | 6.96219  | 7.290112 | 7.388761 | T         |           |

|         |     |          |          |          |          |          |          |          |          |          |          |          |          |          |          |          |          |         |          |          |          |          |          |          |          |          |          |          |          |          |         |              |
|---------|-----|----------|----------|----------|----------|----------|----------|----------|----------|----------|----------|----------|----------|----------|----------|----------|----------|---------|----------|----------|----------|----------|----------|----------|----------|----------|----------|----------|----------|----------|---------|--------------|
| 6756115 | 469 | 7.230407 | 7.196187 | 7.164191 | 7.211597 | 0.018811 | 0.816276 | -0.01541 | 0.84896  | -0.04741 | 0.561853 | 0.031996 | 0.693671 | 0.034221 | 0.673786 | 0.066217 | 0.422523 | 6756115 | 7.248484 | 7.142688 | 7.30005  | 7.236619 | 7.304068 | 7.047873 | 7.103384 | 7.244347 | 7.144841 | 7.131135 | 7.303275 | 7.20038  | Gpatch2 | NM_026367    |
| 6756238 | 472 | 9.286431 | 9.431736 | 8.957886 | 8.957905 | 0.328526 | 0.016897 | 0.473831 | 0.00249  | -2E-05   | 0.999861 | 0.47385  | 0.002489 | -0.1453  | 0.220228 | 0.328546 | 0.016892 | 6756238 | 9.19966  | 9.255723 | 9.403911 | 9.432037 | 9.558098 | 9.305073 | 8.7904   | 9.124304 | 8.958953 | 8.809387 | 9.040572 | 9.023757 | Ptpn14  | NM_008976    |
| 6756334 | 473 | 8.067013 | 8.199872 | 8.141565 | 8.166839 | -0.09983 | 0.187294 | 0.033033 | 0.64602  | -0.02527 | 0.724522 | 0.058306 | 0.424127 | -0.13286 | 0.091242 | -0.07455 | 0.312932 | 6756334 | 8.066423 | 8.052421 | 8.082196 | 8.179691 | 8.311437 | 8.108487 | 8.252906 | 8.124724 | 8.047066 | 8.099775 | 8.139106 | 8.261636 | Angel2  | NM_021421    |
| 6756358 | 476 | 7.706648 | 7.88805  | 7.801198 | 7.611863 | 0.094785 | 0.427065 | 0.276187 | 0.040698 | 0.189335 | 0.133217 | 0.086852 | 0.465314 | -0.1814  | 0.147994 | -0.09455 | 0.428168 | 6756358 | 7.714356 | 7.748115 | 7.657474 | 7.813272 | 7.926024 | 7.924855 | 8.053297 | 7.730621 | 7.619676 | 7.533805 | 7.774996 | 7.526789 | Tmem206 | NM_025864    |
| 6756383 | 477 | 7.893954 | 7.925335 | 7.964186 | 7.732053 | 0.161901 | 0.297936 | 0.193282 | 0.220497 | 0.232133 | 0.14912  | -0.03885 | 0.796115 | -0.03138 | 0.834562 | -0.07023 | 0.642089 | 6756383 | 7.921604 | 7.806823 | 7.953434 | 7.881882 | 8.010251 | 7.883871 | 8.20286  | 7.620287 | 8.069412 | 7.571556 | 7.756839 | 7.867764 | Ints7   | NM_178632    |
| 6756386 | 478 | 7.53612  | 7.492345 | 7.374899 | 7.256202 | 0.279918 | 0.076245 | 0.236143 | 0.124332 | 0.118697 | 0.413265 | 0.117446 | 0.417997 | 0.043775 | 0.75843  | 0.161221 | 0.274853 | 6756386 | 7.423209 | 7.439691 | 7.74546  | 7.344899 | 7.669204 | 7.462931 | 7.454717 | 7.210528 | 7.459451 | 7.075629 | 7.440853 | 7.252123 | Lpgat1  | NM_001134829 |
| 6756394 | 479 | 5.967947 | 6.394516 | 5.858624 | 5.50177  | 0.466177 | 0.154733 | 0.892746 | 0.016832 | 0.356854 | 0.263408 | 0.535892 | 0.108488 | -0.42657 | 0.188409 | 0.109323 | 0.722056 | 6756394 | 5.997564 | 5.676816 | 6.229462 | 6.102469 | 6.993924 | 6.087155 | 6.118027 | 5.367068 | 6.090778 | 5.490399 | 5.503439 | 5.511472 | Nek2    | NM_010892    |
| 6756403 | 480 | 8.466105 | 8.545233 | 8.284855 | 8.436832 | 0.029272 | 0.796823 | 0.1084   | 0.353125 | -0.15198 | 0.204324 | 0.260377 | 0.045403 | -0.07913 | 0.492277 | 0.181249 | 0.137921 | 6756403 | 8.542669 | 8.482117 | 8.373528 | 8.383033 | 8.699755 | 8.55291  | 8.473101 | 8.244796 | 8.136669 | 8.34766  | 8.413408 | 8.549429 | Slc30a1 | NM_009579    |
| 6756408 | 481 | 7.004264 | 6.915972 | 6.940524 | 7.03068  | -0.02642 | 0.874904 | -0.11471 | 0.500324 | -0.09016 | 0.594225 | -0.02455 | 0.883656 | 0.088292 | 0.601738 | 0.06374  | 0.705145 | 6756408 | 7.153878 | 6.859105 | 6.999808 | 7.015969 | 6.618515 | 7.113432 | 7.039289 | 7.122658 | 6.659625 | 7.080544 | 6.933558 | 7.077939 | Rd3     | NM_023727    |
| 6756419 | 482 | 5.899334 | 6.045355 | 5.828564 | 5.7768   | 0.122534 | 0.423961 | 0.268555 | 0.102013 | 0.051763 | 0.731103 | 0.216792 | 0.17439  | -0.14602 | 0.344762 | 0.07077  | 0.639584 | 6756419 | 5.811686 | 5.776094 | 6.110222 | 5.999427 | 6.211712 | 5.924927 | 6.011629 | 5.534914 | 5.939148 | 5.816837 | 5.819266 | 5.694298 | Kcnh1   | NM_010600    |
| 6756473 | 483 | 9.682857 | 9.654752 | 9.66542  | 9.4852   | 0.197657 | 0.104049 | 0.169552 | 0.154376 | 0.180221 | 0.133082 | -0.01067 | 0.923594 | 0.028105 | 0.800885 | 0.017436 | 0.875507 | 6756473 | 9.531525 | 9.710008 | 9.807037 | 9.570506 | 9.726599 | 9.66715  | 9.756279 | 9.78071  | 9.459272 | 9.492887 | 9.590502 | 9.37221  | Irf6    | NM_016851    |
| 6756474 | 484 | 6.486901 | 6.57979  | 6.648983 | 6.813817 | -0.32692 | 0.037028 | -0.23403 | 0.11148  | -0.16483 | 0.243259 | -0.06919 | 0.611287 | -0.09289 | 0.497921 | -0.16208 | 0.250555 | 6756474 | 6.244094 | 6.648412 | 6.568196 | 6.5657   | 6.574548 | 6.599122 | 6.745275 | 6.396787 | 6.804886 | 6.761446 | 6.762868 | 6.91713  |         |              |
